# Psychiatric Services

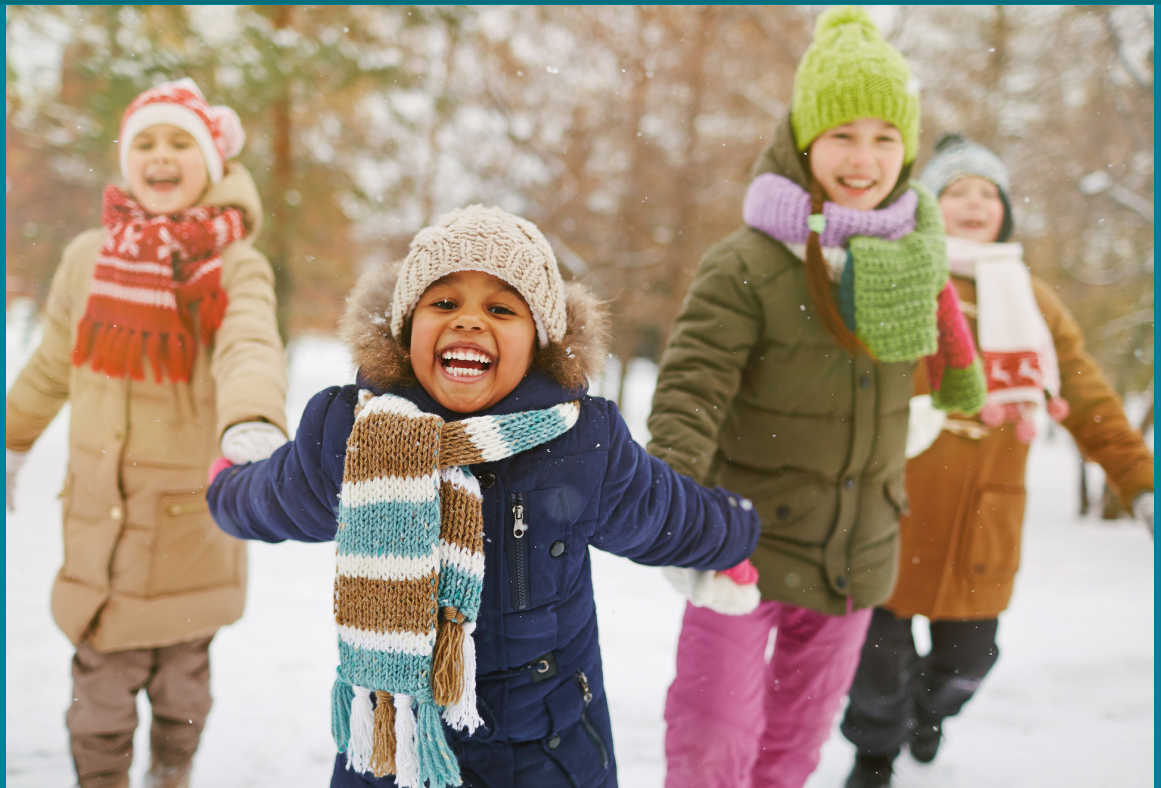

Adequacy of children's psychopharmacology

Impact of medication for opioid use disorder on health care utilization

A caring letters suicide prevention intervention for veterans using the crisis line

System reform for determining competence to stand trial
